# Supplementary material
Source: PubMed Central journal article supplement (PMC4018901)
Supplement: AEM.00029-14_zam999105341so1.pdf [file AEM.00029-14_zam999105341so1.pdf]

# 1 Supporting Information

## 2 Table S1. Primer sequences used for qRT-PCR analysis of gene transcript abundance.

| Gene symbol                         | Annotation                                    | Primer                   | Gene Sequence                                                 |
|-------------------------------------|-----------------------------------------------|--------------------------|---------------------------------------------------------------|
| <b>Nitrogen metabolism</b>          |                                               |                          |                                                               |
| <i>gdh</i>                          | NADH-glutamate dehydrogenase                  | gdh 414F<br>gdh 513R     | 5'-CCTGACCAGCCTTCCTATGG -3'<br>5'-CATGAAGCTCTGGCAGAAACG-3'    |
| <i>gdhA</i>                         | NADPH-glutamate dehydrogenase                 | gdhA 324F<br>gdhA 432R   | 5'-GGGCTTTGAGCAGATCTTCAA -3'<br>5'-TTCTCTGTCCGACTTGCCCTTA -3' |
| <i>glnA</i>                         | Glutamine synthetase, type I                  | glnA 257F<br>glnA 356R   | 5'-GCAGGGTGGTGAGGTTTTTC-3'<br>5'-CGGCATATTCAACTGCATT-3'       |
| <i>glnN</i>                         | Glutamine synthetase, type III                | glnN 749F<br>glnN 848R   | 5'-TGTGGAAGCTGGGCATCTATG-3'<br>5'-TCAGTGGCGATGTTGGTAGTG-3'    |
| <i>gltB</i>                         | Glutamate synthase, large subunit             | gltB 785F<br>gltB 884R   | 5'-ATGTATCACGCACGCGAATG-3'<br>5'-TATACCAGCTGACGCAGGCTCTC-3'   |
| <i>gltD</i>                         | Glutamate synthase, small subunit             | gltD 757F<br>gltD 856R   | 5'-GGCAACTCCGCTATGGATGT-3'<br>5'-CAGTGATGCTTGCGGCTATATG-3'    |
| <i>amtB</i>                         | Ammonium transporter                          | amtB 732F<br>amtB 831R   | 5'-CACCACCACCAACCTTTCG-3'<br>5'-TGCGTTGAGGGTCATGGAA-3'        |
| <i>glnK</i>                         | Nitrogen regulatory protein P-II              | glnK 136F<br>glnK 235R   | 5'-TATCGCGGCGCTGTTATAGA-3'<br>5'-TTCTTGCGGTGTCGATGACA-3'      |
| <i>nifH</i>                         | Nitrogenase reductase iron protein            | nifH 418F<br>nifH 517R   | 5'-GGCTATGCCGACAAGATATTCG-3'<br>5'-CGCGTCCCTTGAAATTATCC-3'    |
| <i>ureC</i>                         | Urease, alpha subunit                         | ureC 870F<br>ureC 969R   | 5'-GGCAGCGTCCCGAATG-3'<br>5'-ATGACACACCATGAGCATATCCA-3'       |
| <b>Internal control genes (ICG)</b> |                                               |                          |                                                               |
| <i>atpD</i>                         | Beta subunit of membrane ATP synthase         | atpD 776F<br>atpD 875R   | 5'-TGGCGGAGTATTTCCGTGAT-3'<br>5'-AGCAGAGCCGAAACCTCAGA-3'      |
| <i>groEL</i>                        | GroEL protein                                 | groEL 794F<br>groEL 893R | 5'-AGGTCCGGCTACGGCTTCAA-3'<br>5'-TTCTGGAGAGCGCTTCTTGTG-3'     |
| <i>infB</i>                         | Initiation factor IF2                         | infB 1479F<br>infB 1578R | 5'-CGTTGCAGAGGGTGAAGCA-3'<br>5'-GTGACCGGGAGTGCCAAGA-3'        |
| <i>rpoB</i>                         | RNA polymerase beta-subunit                   | rpoB 1624F<br>rpoB 1725R | 5'-TTTGAAGTCCGCGATGTCA-3'<br>5'-GAATGATGCCAGATAGGAGATCAGA-3'  |
| <i>murB</i>                         | UDP-N-acetylenolpyruvoylglucosamine reductase | murB 389F<br>murB 488R   | 5'-CCTACGGCATACCCGGAAGT-3'<br>5'-TCAACAGCTCTGCCAGCTT-3'       |
| <i>pgi</i>                          | Glucose-6-phosphate isomerase                 | pgi 580F<br>pgi 679R     | 5'-TTCGTTGTGCCTGATGATGTC-3'<br>5'-GCATCAATGCGTCGATATCG-3'     |

4 **Table S2. qRT-PCR analyses of ten different nitrogen metabolism genes in *R. albus* 8**  
5 **grown on different nitrogen sources.**

| Nitrogen source and gene annotation | Gene        | Locus Tag | Transcript abundance |                      |
|-------------------------------------|-------------|-----------|----------------------|----------------------|
|                                     |             |           | Mid                  | Late                 |
| <b>Ammonium sulfate</b>             |             |           |                      |                      |
| NADH-glutamate dehydrogenase        | <i>gdh</i>  | CUS_6029  | 58.61 <sup>#b</sup>  | 82.11 <sup>*b</sup>  |
| NADPH-glutamate dehydrogenase       | <i>gdhA</i> | CUS_5926  | 0.05 <sup>#a</sup>   | 0.75 <sup>*a</sup>   |
| Glutamine synthetase, typeI         | <i>glnA</i> | CUS_5560  | 10.57 <sup>#a</sup>  | 20.86 <sup>*a</sup>  |
| Glutamine synthetase, typeIII       | <i>glnN</i> | CUS_5996  | 37.52 <sup>#a</sup>  | 22.67 <sup>#a</sup>  |
| Glutamate synthase, large subunit   | <i>gltB</i> | CUS_7682  | 0.06 <sup>#a</sup>   | 9.44 <sup>*a</sup>   |
| Glutamate synthase, small subunit   | <i>gltD</i> | CUS_7183  | 53.46 <sup>#b</sup>  | 106.22 <sup>*c</sup> |
| Ammonium transporter                | <i>amtB</i> | CUS_5997  | 0.43 <sup>#a</sup>   | 35.81 <sup>*a</sup>  |
| Nitrogen regulatory protein P-II    | <i>glnK</i> | CUS_5997  | 0.82 <sup>#a</sup>   | 136.17 <sup>*a</sup> |
| Urease, alpha subunit               | <i>ureC</i> | CUS_4996  | 0.22 <sup>#a</sup>   | 16.33 <sup>*a</sup>  |
| Nitrogenase iron protein            | <i>nifH</i> | CUS_5275  | 59.32 <sup>#b</sup>  | 95.76 <sup>*b</sup>  |
| <b>Urea</b>                         |             |           |                      |                      |
| NADH-glutamate dehydrogenase        | <i>gdh</i>  | CUS_6029  | 31.28 <sup>#a</sup>  | 41.33 <sup>#a</sup>  |
| NADPH-glutamate dehydrogenase       | <i>gdhA</i> | CUS_5926  | 18.91 <sup>#c</sup>  | 47.99 <sup>#b</sup>  |
| Glutamine synthetase, typeI         | <i>glnA</i> | CUS_5560  | 19.43 <sup>#b</sup>  | 39.35 <sup>*a</sup>  |
| Glutamine synthetase, typeIII       | <i>glnN</i> | CUS_5996  | 38.73 <sup>#a</sup>  | 26.36 <sup>#a</sup>  |
| Glutamate synthase, large subunit   | <i>gltB</i> | CUS_7682  | 0.64 <sup>#b</sup>   | 11.51 <sup>*a</sup>  |
| Glutamate synthase, small subunit   | <i>gltD</i> | CUS_7183  | 39.63 <sup>#b</sup>  | 59.36 <sup>*b</sup>  |
| Ammonium transporter                | <i>amtB</i> | CUS_5997  | 4.69 <sup>#b</sup>   | 35.95 <sup>*a</sup>  |
| Nitrogen regulatory protein P-II    | <i>glnK</i> | CUS_5997  | 11.96 <sup>#b</sup>  | 124.41 <sup>*a</sup> |
| Urease, alpha subunit               | <i>ureC</i> | CUS_4996  | 5.23 <sup>#b</sup>   | 34.59 <sup>*b</sup>  |
| Nitrogenase iron protein            | <i>nifH</i> | CUS_5275  | 37.11 <sup>#b</sup>  | 90.28 <sup>*b</sup>  |
| <b>Peptides</b>                     |             |           |                      |                      |
| NADH-glutamate dehydrogenase        | <i>gdh</i>  | CUS_6029  | 76.08 <sup>#b</sup>  | 69.79 <sup>#b</sup>  |
| NADPH-glutamate dehydrogenase       | <i>gdhA</i> | CUS_5926  | 1.21 <sup>#b</sup>   | 218.44 <sup>*c</sup> |
| Glutamine synthetase, typeI         | <i>glnA</i> | CUS_5560  | 57.23 <sup>#c</sup>  | 274.46 <sup>*c</sup> |
| Glutamine synthetase, typeIII       | <i>glnN</i> | CUS_5996  | 32.57 <sup>#a</sup>  | 111.41 <sup>*b</sup> |
| Glutamate synthase, large subunit   | <i>gltB</i> | CUS_7682  | 5.54 <sup>#c</sup>   | 412.94 <sup>*b</sup> |
| Glutamate synthase, small subunit   | <i>gltD</i> | CUS_7183  | 21.10 <sup>a</sup>   | 19.58 <sup>a</sup>   |
| Ammonium transporter                | <i>amtB</i> | CUS_5997  | 8.67 <sup>#c</sup>   | 354.43 <sup>*b</sup> |
| Nitrogen regulatory protein P-II    | <i>glnK</i> | CUS_5997  | 7.40 <sup>#b</sup>   | 202.98 <sup>*b</sup> |
| Urease, alpha subunit               | <i>ureC</i> | CUS_4996  | 7.93 <sup>#b</sup>   | 351.04 <sup>*c</sup> |
| Nitrogenase iron protein            | <i>nifH</i> | CUS_5275  | 15.49 <sup>a</sup>   | 14.86 <sup>a</sup>   |

6 Symbols are used to represent statistical differences. When comparing nitrogen source or growth  
7 phase, absence of a symbol indicates no statistical difference. Otherwise, data is grouped: those  
8 that are not statistically different from one another have the same letter or character, while those

9 that are statistically different have different letters or characters. <sup>a</sup>, <sup>b</sup>, and <sup>c</sup> denote significant (P <  
10 0.05) differences between nitrogen sources, while #, \*, and \$ denote significant (P < 0.05) effects  
11 by different growth phase.

12

13 **Table S3. Effect of ammonia and urea on enzyme activities in *R. albus* 8 in early log phase growth.**

| Nitrogen source | Log phase | GDH               |                    | GS                    | GOGAT                |       | Urease   |                    |
|-----------------|-----------|-------------------|--------------------|-----------------------|----------------------|-------|----------|--------------------|
|                 |           | nmol/min/mg       |                    | U/min/mg              | nmol/min/mg          |       | U/min/mg |                    |
|                 |           | NADPH             | NADH               | $\gamma$ -transferase | Biosynthetic         | NADPH |          | NADH               |
| Ammonia         | Early     | 5.3 <sup>#a</sup> | 95.4 <sup>#a</sup> | 2.2 <sup>#c</sup>     | 2699.9 <sup>#c</sup> | 0.1   | < 0      | 11.4 <sup>#a</sup> |
| Urea            | Early     | 6.8 <sup>#a</sup> | 90.0 <sup>#a</sup> | 0.4 <sup>#b</sup>     | 2378.9 <sup>#b</sup> | < 0   | < 0      | 39.7 <sup>#b</sup> |
| SE              |           | 3.7               | 18.0               | 0.1                   | 94.0                 | 0.1   | 0.1      | 3.0                |

14 Symbols are used to represent statistical differences. When comparing nitrogen source or growth phase, absence of a symbol indicates  
 15 no statistical difference. Otherwise, data is grouped: those that are not statistically different from one another have the same letter or  
 16 character, while those that are statistically different have different letters or characters. <sup>a</sup>, <sup>b</sup>, and <sup>c</sup> denote significant (P < 0.05)  
 17 differences between nitrogen sources, while <sup>#</sup>, <sup>\*</sup>, and <sup>\$</sup> denote significant (P < 0.05) effects by different growth phase.

18 **Table S4. qRT-PCR analyses of ten different nitrogen metabolism genes in *R. albus* 8**  
 19 **grown on ammonia and urea in early log phase growth.**

| Nitrogen source and gene annotation | Gene        | Locus Tag | Transcript abundance |
|-------------------------------------|-------------|-----------|----------------------|
|                                     |             |           | Early                |
| <b>Ammonium sulfate</b>             |             |           |                      |
| NADH-glutamate dehydrogenase        | <i>gdh</i>  | CUS_6029  | 48.01 <sup>#a</sup>  |
| NADPH-glutamate dehydrogenase       | <i>gdhA</i> | CUS_5926  | 0.04 <sup>#a</sup>   |
| Glutamine synthetase, typeI         | <i>glnA</i> | CUS_5560  | 10.97 <sup>#a</sup>  |
| Glutamine synthetase, typeIII       | <i>glnN</i> | CUS_5996  | 27.58 <sup>#a</sup>  |
| Glutamate synthase, large subunit   | <i>gltB</i> | CUS_7682  | 0.07 <sup>#a</sup>   |
| Glutamate synthase, small subunit   | <i>gltD</i> | CUS_7183  | 35.42 <sup>#a</sup>  |
| Ammonium transporter                | <i>amtB</i> | CUS_5997  | 0.15 <sup>#a</sup>   |
| Nitrogen regulatory protein P-II    | <i>glnK</i> | CUS_5997  | 0.30 <sup>#a</sup>   |
| Urease, alpha subunit               | <i>ureC</i> | CUS_4996  | 0.17 <sup>#a</sup>   |
| Nitrogenase iron protein            | <i>nifH</i> | CUS_5275  | 29.93 <sup>#a</sup>  |
| <b>Urea</b>                         |             |           |                      |
| NADH-glutamate dehydrogenase        | <i>gdh</i>  | CUS_6029  | 32.59 <sup>#a</sup>  |
| NADPH-glutamate dehydrogenase       | <i>gdhA</i> | CUS_5926  | 27.51 <sup>#c</sup>  |
| Glutamine synthetase, typeI         | <i>glnA</i> | CUS_5560  | 14.35 <sup>#a</sup>  |
| Glutamine synthetase, typeIII       | <i>glnN</i> | CUS_5996  | 36.47 <sup>#a</sup>  |
| Glutamate synthase, large subunit   | <i>gltB</i> | CUS_7682  | 0.54 <sup>#b</sup>   |
| Glutamate synthase, small subunit   | <i>gltD</i> | CUS_7183  | 35.33 <sup>#a</sup>  |
| Ammonium transporter                | <i>amtB</i> | CUS_5997  | 3.23 <sup>#b</sup>   |
| Nitrogen regulatory protein P-II    | <i>glnK</i> | CUS_5997  | 6.46 <sup>#b</sup>   |
| Urease, alpha subunit               | <i>ureC</i> | CUS_4996  | 3.24 <sup>#a</sup>   |
| Nitrogenase iron protein            | <i>nifH</i> | CUS_5275  | 27.80 <sup>#a</sup>  |

20 Symbols are used to represent statistical differences. When comparing nitrogen source or growth  
 21 phase, absence of a symbol indicates no statistical difference. Otherwise, data is grouped: those  
 22 that are not statistically different from one another have the same letter or character, while those  
 23 that are statistically different have different letters or characters. <sup>a</sup>, <sup>b</sup>, and <sup>c</sup> denote significant (P <  
 24 0.05) differences between nitrogen sources, while <sup>#</sup>, <sup>\*</sup>, and <sup>\$</sup> denote significant (P < 0.05) effects  
 25 by different growth phase.
